## Associations of hypertension and antenatal care-seeking with perinatal mortality: A nested case-control study in rural Bangladesh

Allyson P. Bear<sup>1,#a,\*</sup>, Wendy L. Bennett<sup>2</sup>, Joanne Katz<sup>1</sup>, Kyu Han Lee<sup>1</sup>, Atique Iqbal Chowdhury<sup>3</sup>, Sanwarul Bari<sup>3</sup>, Shams El Arifeen<sup>3</sup>, Emily S. Gurley<sup>1</sup>

<sup>1</sup> Department of International Health, Johns Hopkins Bloomberg School of Public Health, Baltimore, Maryland, USA

<sup>2</sup> Division of General Internal Medicine, Department of Medicine, Johns Hopkins School of Medicine, Baltimore, Maryland, USA

<sup>3</sup> Division of Maternal and Child Health, International Centre for Diarrheal Disease Research, Bangladesh, Dhaka, Bangladesh

<sup>#a</sup> Current address: International Development Division, Abt Associates, Rockville, Maryland, USA

\*Corresponding Author

Email: [allyson\\_bear@abtassoc.com](mailto:allyson_bear@abtassoc.com) (APB)

## 1 **Abstract**

2 Maternal hypertension may be an underrecognized but important risk factor for perinatal death in low  
3 resource settings. We investigated the association of maternal hypertension and perinatal mortality in  
4 rural Bangladesh.

5 This nested, matched case-control study used data from a 2019 cross-sectional survey and demographic  
6 surveillance database in Baliakandi, Bangladesh. We randomly matched each pregnancy ending in  
7 perinatal death with five pregnancies in which the neonate survived beyond seven days based on  
8 maternal age, education, and wealth quintile. We estimated associations of antenatal care-seeking and  
9 self-reported hypertension with perinatal mortality using conditional logistic regression and used  
10 median and interquartile ranges to assess the mediation of antenatal care by timing or frequency.

11 Among 191 cases and 934 matched controls, hypertension prevalence was 14.1% among cases and 7.7%  
12 among controls. Compared with no diagnosis, the probability of perinatal death was significantly higher  
13 among women with a pre-gestational hypertension diagnosis (OR 2.90, 95% CI 1.29, 6.57), but not  
14 among women with diagnosis during pregnancy (OR 1.68, 95% CI 0.98, 2.98). We found no association  
15 between the number of antenatal care contacts and perinatal death ( $p=0.66$ ). Among women with  
16 pre-gestational hypertension who experienced a perinatal death, 78% had their first antenatal contact in  
17 the sixth or seventh month of gestation.

18 Hypertension was more common among rural women who experience a perinatal death. Greater effort  
19 to prevent hypertension prior to conception and provide early maternity care to women with  
20 hypertension could improve perinatal outcomes in rural Bangladesh.

## 21 Introduction

22 Hypertensive disorders of pregnancy include maternal chronic hypertension, pregnancy-induced  
23 hypertension, pre-eclampsia, and eclampsia. Globally, these conditions are estimated to complicate 5–  
24 10% of all pregnancies and are responsible for 16% of the estimated 2.6 million stillbirths and 50% of the  
25 estimated 2.9 million neonatal deaths each year.<sup>1–6</sup> In 2010, an estimated 224 million women of  
26 reproductive age across the world had chronic hypertension.<sup>7</sup>

27 Between 2011 and 2018, the prevalence of hypertension in Bangladeshi women over the age of 35  
28 increased from 32% to 45%.<sup>8,9</sup> In 2018, the prevalence of hypertension in women aged 18–34 was  
29 12.5%.<sup>8</sup> The burden of pregnancy-induced or chronic hypertension in pregnancy is less well understood  
30 in the Bangladesh context, as is its impact on the fetus or neonate. In 2018, neonatal mortality in  
31 Bangladesh accounted for two-thirds of child mortality (3% of live births). Perinatal mortality, or death  
32 occurring from 28 weeks’ gestation through the seventh day of life, occurred in 4.8% of pregnancies in  
33 Bangladesh, of which 52% were stillbirths.<sup>8,9</sup>

34 Women are encouraged to seek early and regular antenatal care from a medically qualified provider to  
35 ensure a healthy pregnancy and safe birth.<sup>10</sup> In Bangladesh, between 2014 and 2018, the percentage of  
36 women receiving any antenatal care from a medically qualified provider increased from 64% to 82%.<sup>8,11</sup>  
37 In 2018, 42% of women in rural areas received four or more antenatal care contacts during pregnancy,  
38 although this increase in care seeking has not corresponded with a reduction in perinatal mortality.<sup>8,12</sup>

39 The objective of this study was to investigate the association between maternal hypertension and the  
40 risk of perinatal mortality in rural Bangladesh, and whether that association was mediated by antenatal  
41 care.

## 42 **Methods**

### 43 **Study Setting and Study Design**

44 This nested, matched case-control study was a sub-study of the Child Health and Mortality Prevention  
45 Surveillance (CHAMPS) project site in the Baliakandi sub-district of Bangladesh. CHAMPS Bangladesh  
46 began active population-based demographic surveillance in September 2017 in Baliakandi on a  
47 population of approximately 220,000. The details of CHAMPS methods have been published  
48 elsewhere.<sup>13,14</sup> Ethical approval for the study was provided by the Ethical Review Committee of the  
49 International Centre for Diarrhoeal Disease Research, Bangladesh.

### 50 **Cross sectional survey**

51 From April to August 2019, we conducted a single survey among married women of reproductive age in  
52 the CHAMPS Baliakandi demographic surveillance system. The survey tool was based on the  
53 Demographic and Health Survey (DHS) Program and the WHO STEPwise approach to surveillance  
54 surveys.<sup>15,16</sup> The questions were translated into Bengali and validated through prior national  
55 surveys.<sup>8,9,11,17</sup> All married women of reproductive age living in households with a child (living or dead)  
56 under five years of age, or a woman currently pregnant or pregnant within the previous 12 months,  
57 were eligible to participate. One week prior to the start of data collection in each block of the  
58 demographic surveillance system, a listing of households meeting the eligibility criteria was generated  
59 using CHAMPS data. Data collectors conducted face-to-face interviews after taking written informed  
60 consent from the woman. If the woman was under 18 years of age, informed assent was taken and  
61 witnessed by a guardian from the household. Data collectors conducted up to nine follow-up visits to  
62 complete the data collection, with women self-reporting previous screenings, diagnoses of diabetes and  
63 hypertension and timing of any diagnoses, the numbers of antenatal care contacts they had during  
64 current and recent pregnancies, and the location, type of health care provider, and services rendered.

65 No medical records were available to confirm the self-reported information.

## 66 Demographic surveillance databases from parent cohort study

67 We used the CHAMPS demographic surveillance database dated February 26, 2020 to identify all  
68 singleton pregnancy outcomes among survey respondents to include those outcomes which took place  
69 up to one year before or 14 days after the date of the survey. We only considered singleton pregnancies  
70 for this analysis, as multiparity is an independent risk factor for perinatal death.<sup>12,18</sup> We extracted  
71 demographic, socio-economic and pregnancy history information for each woman with an eligible  
72 pregnancy from the CHAMPS demographic surveillance database by linking unique identification  
73 numbers.

## 74 Outcome: Perinatal Death

75 Perinatal death was defined as a pregnancy ending in the death of the offspring between the completion  
76 of 28 weeks gestation and seven days following delivery.<sup>19</sup> Deaths occurring after 28 weeks of  
77 pregnancy, but before or during birth were classified as a stillbirth; those occurring between 0 and 7  
78 completed days after birth were classified as early neonatal deaths.<sup>19</sup>

## 79 Exposure: Hypertension

- 80 • Any hypertension: Any self-reported diagnosis of hypertension, regardless of timing.
- 81 • Presumed pre-gestational (chronic) hypertension: Self-reported diagnosis of hypertension at any  
82 time prior to the index pregnancy.
- 83 • Presumed gestational hypertension: Self-reported diagnosis of hypertension during or after the  
84 index pregnancy, in the absence of any self-reported previous diagnosis of hypertension. We  
85 assumed that hypertension diagnosed post-partum was likely due to unresolved hypertension  
86 that was present during pregnancy.

## 87 **Data Analysis**

### 88 **Selection of Cases and Controls**

89 Cases of pregnancies ending in a perinatal death were identified by comparing the date of pregnancy  
90 outcome and date of the woman's last menstrual period preceding the pregnancy. Eligibility to serve as  
91 a matched control was defined as a pregnancy ending in a live birth in which the neonate survived  
92 beyond seven days, such a pregnancy being identified by the absence of a reported death within the  
93 first seven days of life in the CHAMPS demographic surveillance system. Among cases and eligible  
94 controls, we excluded pregnancies in women who reported no previous screening for hypertension and  
95 pregnancies for which we had no antenatal care information. For women who had more than one  
96 eligible pregnancy, we selected the pregnancy with an outcome closest to the survey date.

### 97 **Matching**

98 Based on a literature review of confounders for the relationship between hypertensive disorders of  
99 pregnancy and perinatal mortality we matched on the following characteristics: age group (<20, 20–24,  
100 25–29, 30–34, 35–39, 40+), wealth quintile, and educational attainment (none, primary, secondary,  
101 post-secondary).<sup>8,20–25</sup> The wealth quintile was constructed using the DHS wealth index score.<sup>26,27</sup> We  
102 randomly matched, without replacement, each case with up to five controls. For cases with fewer than  
103 five matched controls, we conducted the analysis with the controls as matched.  
104 Using summary statistics and chi-squared tests, we examined the differences in demographic,  
105 hypertension, and pregnancy characteristics between cases and controls. We then used conditional  
106 logistic regression in the matched case-control groups to estimate probability ratios for perinatal death  
107 by any hypertension diagnosis, nature of hypertension, and number of antenatal care contacts with a  
108 qualified provider (0, <4, 4+) for the index pregnancy. Looking at median and interquartile ranges for

109 antenatal care timing and frequency, we explored the relationship between antenatal care-seeking, the  
110 type of hypertension, and perinatal death.  $P < 0.05$  was considered statistically significant for all analyses.

## 111 Results

112 A total of 4,550 pregnancies met the eligibility criteria for inclusion in the study, including 201 perinatal  
113 deaths (Fig 1). The overall perinatal mortality rate was 44 per 1,000 pregnancies (4.4%), which was  
114 consistent with national surveys.<sup>8,11</sup> Among women with eligible pregnancies, 97.5% reported screening  
115 for hypertension at least once in their lifetimes. Of those screened, 415 (9.4%) reported a diagnosis of  
116 hypertension. A total of 216 (4.7%) pregnancies met exclusion criteria, leaving 4,333 unique women with  
117 pregnancies eligible for matching, including 191 cases of perinatal death (Fig 1). After matching, 10 cases  
118 had greater than one but fewer than five matched controls. The final analysis included 191 cases and  
119 934 matched controls (Fig 1). There were no cases of perinatal death among 19 pregnancies in women  
120 over 40 years of age. This age group was dropped from the analysis.

121 Fig 1. Sample selection of women, nested case-control study, hypertension and perinatal mortality in  
122 Baliakandi, Bangladesh, 2019

123 Among women who experienced a perinatal death, 79% (151/191) were under 30 years of age, and over  
124 two-thirds (69%, 131/191) had completed secondary education or higher (Table 1). There were fewer  
125 cases of perinatal death among women in the highest wealth quintile (12.6%) compared with lower  
126 wealth quintiles. Slightly more than half (56%) of perinatal deaths were classified as stillbirths (Table 1).  
127 Women who experienced a perinatal death were more likely to report being diagnosed with  
128 hypertension compared with controls (14.1% vs. 7.7%,  $p < 0.01$ ), and to have pre-gestational high blood  
129 pressure (5.2% vs. 2.0%,  $p = 0.01$ ). The proportion of women who had no contact with a qualified health  
130 care provider during pregnancy was similar between cases (18.5%) and controls (20.1%) (Table 1).

131 Table 1. Comparisons of socio-economic characteristics, health history, and care seeking in pregnancy  
 132 between cases and matched controls, Baliakandi, Bangladesh, 2019

| Characteristic                                           | Cases of perinatal death (n = 191) | Matched Controls (n = 934) | P value |
|----------------------------------------------------------|------------------------------------|----------------------------|---------|
| Mean maternal age in years at the time of birth          | 23.6                               | 23.8                       | 0.75    |
| <b>Maternal Age in Years</b>                             |                                    |                            | 1.00    |
| <20                                                      | 55 (28.8)                          | 271 (29.0)                 |         |
| 20–24                                                    | 64 (33.5)                          | 318 (34.0)                 |         |
| 25–29                                                    | 32 (16.7)                          | 154 (16.5)                 |         |
| 30–34                                                    | 28 (14.7)                          | 138 (14.8)                 |         |
| 35–39                                                    | 12 (6.3)                           | 53 (5.7)                   |         |
| <b>Education Completed</b>                               |                                    |                            | 1.00    |
| None                                                     | 13 (6.8)                           | 53 (5.7)                   |         |
| Primary                                                  | 47 (24.6)                          | 226 (24.2)                 |         |
| Secondary                                                | 91 (47.6)                          | 455 (48.7)                 |         |
| Post-Secondary                                           | 40 (20.9)                          | 200 (21.4)                 |         |
| <b>Household Wealth Quintile</b>                         |                                    |                            | 1.00    |
| Lowest                                                   | 42 (22.0)                          | 208 (22.3)                 |         |
| Second                                                   | 38 (20.0)                          | 186(19.9)                  |         |
| Middle                                                   | 47 (24.6)                          | 222 (23.8)                 |         |
| Fourth                                                   | 40 (20.9)                          | 198 (21.2)                 |         |
| Highest                                                  | 24 (12.6)                          | 120 (12.8)                 |         |
| <b>Timing of Perinatal Death</b>                         |                                    |                            |         |
| Stillbirth                                               | 108 (56.5)                         | NA                         |         |
| Early Neonatal Death                                     | 83 (43.5)                          | NA                         |         |
| <b>Any Hypertension Diagnosis</b>                        | 27 (14.1)                          | 72 (7.7)                   | <0.01*  |
| <b>Nature of Hypertension</b>                            |                                    |                            | <0.01*  |
| None                                                     | 164 (85.9)                         | 862 (92.3)                 |         |
| Presumed pre-gestational hypertension                    | 10 (5.2)                           | 19 (2.0)                   |         |
| Presumed gestational hypertension                        | 17 (8.9)                           | 53(5.7)                    |         |
| <b>Antenatal Care Contacts with a Qualified Provider</b> |                                    |                            | 0.80    |
| None                                                     | 36 (18.5)                          | 192 (20.1)                 |         |
| <4                                                       | 115 (60.2)                         | 562 (60.2)                 |         |
| 4 or more                                                | 40 (20.9)                          | 180 (19.3)                 |         |

133 \* denotes significance at the p<0.05 level

134



## 135 **Hypertension and Perinatal Death**

136 Women who reported any hypertension diagnosis were more likely to experience perinatal death, and  
137 risk of perinatal death differed by timing of hypertension diagnosis. Women with pre-gestational  
138 hypertension experienced a 2.9-fold greater risk of perinatal death (OR 2.90, 95% CI 1.29, 6.57) than  
139 women who reported no diagnosis. Women with presumed gestational hypertension experienced a 68%  
140 increased probability of perinatal death (OR 1.68, 95% CI 0.98, 2.98) than women who reported no  
141 diagnosis, but this was not statistically significant.

142 Table 2. Conditional logistic regression estimating univariate associations of hypertension status and  
143 antenatal care with perinatal death, matched on age group, educational attainment, and wealth  
144 quintile, Baliakandi, Bangladesh, 2019

| Characteristic                                           | Matched Odds Ratio<br>(95% CI) |
|----------------------------------------------------------|--------------------------------|
| <b>Any Hypertension Diagnosis</b>                        | <b>1.97 (1.23,3.19)*</b>       |
| Nature of Hypertension                                   |                                |
| None                                                     | Ref                            |
| Presumed pre-gestational hypertension                    | 2.90 (1.29,6.57)*              |
| Presumed gestational hypertension                        | 1.68 (0.95,2.98)               |
|                                                          |                                |
| <b>Antenatal Care Contacts with a Qualified Provider</b> |                                |
| None                                                     | Ref                            |
| <4                                                       | 1.11 (0.73,1.67)               |
| 4 or more                                                | 1.22 (0.73,2.02)               |

145 \* denotes significance at the  $p < 0.05$  level

146

## 147 **Antenatal Care Service Contacts**

148 We found no association between the number of antenatal care contacts with a qualified provider and  
149 perinatal death (Table 2). Among women who experienced a perinatal death, 81% sought antenatal care  
150 at least once from a medically qualified provider. We evaluated the frequency and timing of antenatal

151 care among women with any hypertension diagnosis by perinatal outcome (Fig 2). Across all categories  
152 of perinatal outcome and hypertension status, the total number of contacts with qualified health care  
153 providers in each pregnancy was below both the national standard of four and the WHO  
154 recommendation of eight antenatal care visits.<sup>10</sup> Women with presumed gestational hypertension had a  
155 higher median number of contacts with medically qualified providers (median 3, IQR 1,4) than women  
156 with presumed pre-gestational hypertension (median 2, IQR 1,3) and women never diagnosed with  
157 hypertension (median 2, IQR 1,3), and this difference was statistically significant ( $p=0.02$ ). The median  
158 number of contacts with a qualified health care provider did not differ significantly by perinatal outcome  
159 within hypertension groups ( $p=0.66$ ).

160 Fig 2. Number of antenatal service contacts by nature of hypertension and pregnancy outcome,  
161 Baliakandi, Bangladesh, 2019 (n=1,125)

162 Among women who sought any care during pregnancy, 33% (339/1,023) obtained their first antenatal  
163 service from a non-qualified provider. Most of these service contacts (90%, 306/339) took place at home  
164 in median month four (IQR 2,5) or at a satellite clinic close to home at median month three (IQR 3,5).  
165 Among women who sought care with a medically qualified provider, the median first antenatal care  
166 contact was in the second trimester of pregnancy in all groups (Fig 3). We found no difference in median  
167 timing of first contact with a medically qualified provider by pregnancy outcome among women with no  
168 history of hypertension ( $p=0.42$ ) (Fig 3). Women with presumed pre-gestational hypertension who  
169 experienced a perinatal death had their median first contact with a qualified provider later than any  
170 other group, in the sixth month of gestation (IQR 6, 8) (Fig 3), and 89% of these women sought this care  
171 in a health care facility (clinic or hospital). There was high variation in timing of first antenatal service  
172 contact within almost all groups, the exception being the group of women with presumed  
173 pre-gestational hypertension who experienced a perinatal death, 78% (7 out of 9) of which had their  
174 first antenatal service contact with a qualified care provider in the sixth or seventh month of pregnancy.

175 Fig 3. Month of first contact with a medically qualified provider during pregnancy, by nature of  
176 hypertension and pregnancy outcome, Baliakandi, Bangladesh, 2019 (n=897)

## 177 Discussion

178 This retrospective case-control study of 1,125 women found that any pre-pregnancy history of  
179 hypertension was a significant risk factor for perinatal death in Baliakandi sub-district, Bangladesh.  
180 Antenatal care was suboptimal in timing and frequency among all groups of women regardless of  
181 hypertension status or pregnancy outcome, and the frequency of antenatal care-seeking was not  
182 associated with fetal or newborn survival.

183 Chronic hypertension in younger women has not been well studied in Bangladesh. The first national  
184 hypertension prevalence survey of women 18–34 years of age was published in 2020.<sup>8</sup> Pre-eclampsia is a  
185 well-recognized complication of pregnancy in Bangladesh, and previous studies have found that  
186 pre-eclampsia contributes to 24% of maternal mortality, 7% of stillbirths, and 2.9% of neonatal  
187 deaths.<sup>12,28,29</sup> Khanam et. al found that probable pregnancy-induced hypertension was a significant risk  
188 factor for stillbirth (IRR = 1.8, 95% CI 1.3–2.5) in Sylhet, Bangladesh.<sup>30</sup> This study suggests that underlying  
189 chronic high blood pressure may be contributing more significantly to perinatal death than has been  
190 previously recognized in Bangladesh. Future studies looking at the etiology of perinatal death should  
191 attempt to better differentiate between underlying chronic disease and pregnancy-induced disease in  
192 order to inform the development of effective public health and medical interventions for preventing  
193 adverse pregnancy outcomes.

194 In all rural areas of Bangladesh, 21% of women seek no antenatal care in pregnancy, and only 20% are  
195 seen four or more times by a qualified health care provider.<sup>8</sup> Our study found similar antenatal  
196 care-seeking patterns among women in Baliakandi.<sup>8</sup> Baliakandi women in our study who experienced a

197 perinatal death had the same median number of antenatal care visits (three) from a qualified antenatal  
198 care provider as rural women elsewhere in Bangladesh, with the median timing of first contact with a  
199 qualified health care provider taking place in the fourth month of pregnancy.<sup>29</sup> Our study suggests that  
200 this timing and frequency of antenatal care is insufficient to prevent adverse perinatal outcomes.  
201 Additional research is needed to understand why this contact with the health care system did not have a  
202 protective effect. Possible explanations could be related to poor quality of care by the health care  
203 provider, late onset of care-seeking, or weak referral systems once complications were identified.<sup>31–34</sup>  
204 Women with a history of hypertension predating pregnancy and who experienced a perinatal death  
205 sought care late in their pregnancies, possibly spurred by the onset of hypertension-induced  
206 complications. Further qualitative research is needed to understand why women with pregnancies  
207 complicated by hypertension, including women with a known history of disease, did not have more  
208 frequent contact, as per national guidelines, with the health care system in order to effectively manage  
209 their high-risk pregnancy.<sup>35</sup> Focused efforts to identify women with a history of disease and encourage  
210 them to seek early and regular antenatal care from a hospital-level facility equipped to treat high-risk  
211 pregnancies could be an effective intervention for improving outcomes in this high-risk group, but only if  
212 those facilities are equipped with the personnel, equipment, supplies, and essential medicines to  
213 effectively manage hypertension in pregnancy.<sup>2,6,34</sup>

214 A limitation of this study is the potential for misclassification due to the absence of direct measurement  
215 or medical records to confirm self-reported information on hypertension diagnosis and antenatal  
216 care-seeking. We posit that a woman’s ability to correctly recall a pre-pregnancy diagnosis of  
217 hypertension is independent of perinatal outcome, in which case misclassification would result in our  
218 findings being an underestimate of the true magnitude of the association between hypertension and  
219 perinatal death. It is possible, in the effort to understand the causes of adverse events, that women who  
220 experienced a perinatal death were more likely to be correctly identified as hypertensive than those

221 with a healthy outcome, leading to differential misclassification by outcome and an overestimate of the  
222 association between hypertension diagnosis, either during or after pregnancy, and perinatal death. The  
223 marginal association between presumed gestational hypertension and perinatal death (OR 1.68, 95% CI  
224 0.98, 2.98) suggests a clear association that would have been statistically significant with a larger sample  
225 size. These data provide a baseline for future longitudinal research to both investigate the temporality  
226 of hypertension and further elucidate how hypertension affects pregnancy outcomes throughout a  
227 woman's childbearing years in rural, resource-constrained settings.

228 The Government of Bangladesh is committed to reducing the neonatal mortality rate to 18 deaths per  
229 1,000 live births by 2022.<sup>36</sup> In order to achieve both this goal and that of similar reductions in stillbirths,  
230 greater emphasis should be placed on identification of women with a history of hypertension and  
231 improving their access to and utilization of skilled antenatal and delivery care. Consistent with national  
232 guidelines, antenatal care for women with pre-gestational hypertension should be early, frequent, and  
233 take place in hospital settings with the trained personnel, equipment, supplies, and medicines necessary  
234 for effective management of complicated pregnancies.<sup>35</sup> Raising community awareness of the dangers  
235 of hypertension in pregnancy, especially when there is a diagnosis of hypertension prior to pregnancy,  
236 should be included in any programs introduced to address low care-seeking among these high-risk  
237 women.<sup>35</sup>

## 238 **References**

- 239 1. Hutcheon JA, Fellow PD, Lisonkova S, Joseph KS. Epidemiology of pre-eclampsia and the other  
240 hypertensive disorders of pregnancy. *Best Pract Res Clin Obstet Gynaecol*. 2011 Aug 1;25(4):391–  
241 403.
- 242 2. Magee LA, Pels A, Helewa M, Rey E, von Dadelszen P, Audibert F, et al. Diagnosis, evaluation, and  
243 management of the hypertensive disorders of pregnancy. *Pregnancy Hypertension: An*  
244 *International Journal of Women's Cardiovascular Health*. 2014 Apr 1;4(2):105–45.
- 245 3. Lawn JE, Blencowe H, Oza S, You D, Lee AC, Waiswa P, et al. Every Newborn: progress, priorities,  
246 and potential beyond survival. *The Lancet*. 2014 Jul;384(9938):189–205.

- 247 4. Lawn JE, Blencowe H, Waiswa P, Amouzou A, Mathers C, Hogan D, et al. Stillbirths: rates, risk  
248 factors, and acceleration towards 2030. *Lancet*. 2016;387:587–603.
- 249 5. Vogel JP, Souza JP, Mori R, Morisaki N, Lumbiganon P, Laopaiboon M, et al. Maternal  
250 complications and perinatal mortality: findings of the World Health Organization Multicountry  
251 Survey on Maternal and Newborn Health. *BJOG*. 2014 Mar;121:76–88.
- 252 6. von Dadelszen P, Magee LA. Preventing deaths due to the hypertensive disorders of pregnancy.  
253 *Best Pract Res Clin Obstet Gynaecol*. 2016 Oct 1;36:83–102.
- 254 7. Mills KT, Bundy JD, Kelly TN, Reed JE, Kearney PM, Reynolds K, et al. Global disparities of  
255 hypertension prevalence and control. *Circulation*. 2016 Aug 9;134(6):441–50.
- 256 8. National Institute of Population Research and Training (NIPORT), Mitra and Associates and II.  
257 Bangladesh Demographic and Health Survey 2017-18: Key Indicators. Dhaka, Bangladesh, and  
258 Rockville, Maryland, USA; 2019.
- 259 9. National Institute of Population Research and Training (NIPORT), Mitra and Associates and II.  
260 Bangladesh Demographic and Health Survey 2011. Dhaka, Bangladesh, and Rockville, Maryland;  
261 2013.
- 262 10. World Health Organization. Standards for maternal and neonatal care. World Health  
263 Organization; 2019.
- 264 11. National Institute of Population Research and Training (NIPORT), Mitra and Associates and  
265 International. Bangladesh Demographic and Health Survey 2014. Dhaka, Bangladesh, and  
266 Rockville, Maryland, USA; 2016.
- 267 12. Owais A, Faruque ASG, Das SK, Ahmed S, Rahman S, Stein AD. Maternal and Antenatal Risk  
268 Factors for Stillbirths and Neonatal Mortality in Rural Bangladesh: A Case-Control Study.  
269 Moormann AM, editor. *PLoS ONE*. 2013 Nov 7;8(11):e80164.
- 270 13. Cunningham SA, Shaikh NI, Nhalo A, Raghunathan PL, Kotloff K, Naser AM, et al. Health and  
271 Demographic Surveillance Systems Within the Child Health and Mortality Prevention Surveillance  
272 Network. *Clin Infect Dis*. 2019 Oct 9;69(4):S274–9.
- 273 14. Salzberg NT, Sivalogan K, Bassat Q, Taylor AW, Adedini S, El Arifeen S, et al. Mortality Surveillance  
274 Methods to Identify and Characterize Deaths in Child Health and Mortality Prevention  
275 Surveillance Network Sites. *Clin Infect Dis*. 2019 Oct 9;69(4):S262–73.
- 276 15. Riley L, Guthold R, Cowan M, Savin S, Bhatti L, Armstrong T, et al. The World Health Organization  
277 STEPwise Approach to Noncommunicable Disease Risk-Factor Surveillance: Methods, Challenges,  
278 and Opportunities. *Am J Public Health*. 2016 Jan;106(1):74–8.
- 279 16. ICF. DHS Model Questionnaire - Phase 7. Rockville, Maryland; 2015.
- 280 17. World Health Organization. Non-Communicable Disease Risk Factor Survey Bangladesh 2010.  
281 Dhaka, Bangladesh: World Health Organization, South-East Asia Regional Office; 2011.
- 282 18. Ganchimeg T, Mori R, Ota E, Koyanagi A, Gilmour S, Shibuya K, et al. Maternal and perinatal  
283 outcomes among nulliparous adolescents in low- and middle-income countries: a multi-country  
284 study. *BJOG: An International Journal of Obstetrics & Gynaecology*. 2013 Dec 1;120(13):1622–30.
- 285 19. Perinatal mortality rate [Internet]. Family Planning and Reproductive Health Indicators Database.  
286 2020 [cited 2021 Jan 18]. Available from:  
287 [https://www.measureevaluation.org/prh/rh\\_indicators/womens-health/nb/perinatal-mortality-r](https://www.measureevaluation.org/prh/rh_indicators/womens-health/nb/perinatal-mortality-r)

- 288 ate-pmr
- 289 20. Tareque MI, Koshio A, Tiedt AD, Hasegawa T. Are the rates of hypertension and diabetes higher  
290 in people from lower socioeconomic status in Bangladesh? Results from a nationally  
291 representative survey. Ciccozzi M, editor. PLoS One. 2015 May 27;10(5):e0127954.
- 292 21. Fottrell E, Ahmed N, Shaha SK, Jennings H, Kuddus A, Morrison J, et al. Distribution of diabetes,  
293 hypertension and non-communicable disease risk factors among adults in rural Bangladesh: a  
294 cross-sectional survey. *BMJ Glob Health*. 2018;3:787.
- 295 22. Akter S, Jesmin S, Rahman MMMdM, Islam MdM, Khatun MostT, Yamaguchi N, et al. Higher  
296 Gravidity and Parity Are Associated with Increased Prevalence of Metabolic Syndrome among  
297 Rural Bangladeshi Women. PLoS One. 2013 Aug 2;8(8):e68319.
- 298 23. Bishwajit G, Yaya S, Seydou I. Diabetes mellitus and high blood pressure in relation to BMI among  
299 adult non-pregnant women in Bangladesh. *Diabetes and Metabolic Syndrome: Clinical Research  
300 and Reviews*. 2016 Dec 13;11:S217–21.
- 301 24. Shih YH, Scannell Bryan M, Parvez F, Uesugi KH, Shahriar M, Ahmed A, et al. Gravidity, parity,  
302 blood pressure and mortality among women in Bangladesh from the HEALS cohort. *BMJ Open*.  
303 2020 Aug 26;10(8).
- 304 25. Jang M, Lee Y, Choi J, Kim B, Kang J, Kim Y, et al. Association between parity and blood pressure  
305 in Korean women: Korean National Health and Nutrition Examination Survey, 2010-2012. *Korean  
306 J Fam Med*. 2015;36(6):341–8.
- 307 26. Rutstein SO. *The DHS Wealth Index: Approaches for Rural and Urban Areas*. Rockville, Maryland;  
308 2008 Oct.
- 309 27. Rutstein SO, Johnson K. *The DHS wealth index*. DHS Comparative Reports No. 6. Calverton,  
310 Maryland; 2004 Aug.
- 311 28. National Institute of Population Research and Training (NIPORT), MEASURE Evaluation, and icddr  
312 b. *Bangladesh Maternal Mortality and Health Care Survey 2010*. Dhaka, Bangladesh; 2012.
- 313 29. MEASURE Evaluation, National Institute of Population Research and Training, International  
314 Centre for Diarrhoeal Disease Research, Bangladesh and ME. *Bangladesh: Maternal Mortality and  
315 Health Care Survey 2016: Preliminary Report*. Dhaka, Bangladesh and Chapel Hill, North Carolina,  
316 USA; 2017.
- 317 30. Khanam R, Ahmed S, Creanga AA, Begum N, Koffi AK, Mahmud A, et al. Antepartum  
318 complications and perinatal mortality in rural Bangladesh. *BMC Pregnancy and Childbirth*.  
319 2017;17(81).
- 320 31. Shamba D, Tancred T, Hanson C, Wachira J, Manzi F. Delayed illness recognition and multiple  
321 referrals: A qualitative study exploring care-seeking trajectories contributing to maternal and  
322 newborn illnesses and death in southern Tanzania. *BMC Health Services Research*. 2019 Apr  
323 11;19(1):225.
- 324 32. Ahmed J, Alam A, Khokhar S, Khowaja S, Kumar R, Greenow CR. Exploring women’s experience of  
325 healthcare use during pregnancy and childbirth to understand factors contributing to perinatal  
326 deaths in Pakistan: A qualitative study. Ornaghi S, editor. PLOS ONE. 2020 May 7;15(5):e0232823.
- 327 33. Edgard-Marius O, Charles SJ, Jacques S, Justine GCC, Virginie MA, Ibrahim MA, et al.  
328 Determinants of Low Antenatal Care Services Utilization during the First Trimester of Pregnancy  
329 in Southern Benin Rural Setting. *Universal Journal of Public Health*. 2015 Sep;3(5):220–8.

- 330 34. Jo Y, Alland K, Ali H, Mehra S, Lefevre AE, Pak S, et al. Antenatal care in rural Bangladesh: Current  
331 state of costs, content and recommendations for effective service delivery. BMC Health Services  
332 Research. 2019 Nov 21;19(1):861.
- 333 35. Maternal and Neonatal Health Standard Operating Procedures. Dhaka, Bangladesh; 2017.
- 334 36. Welfare M of H and F. 4th Bangladesh Health, Population and Nutrition Sector Programme,  
335 January 2017-June 2022. Dhaka, Bangladesh; 2017.
- 336



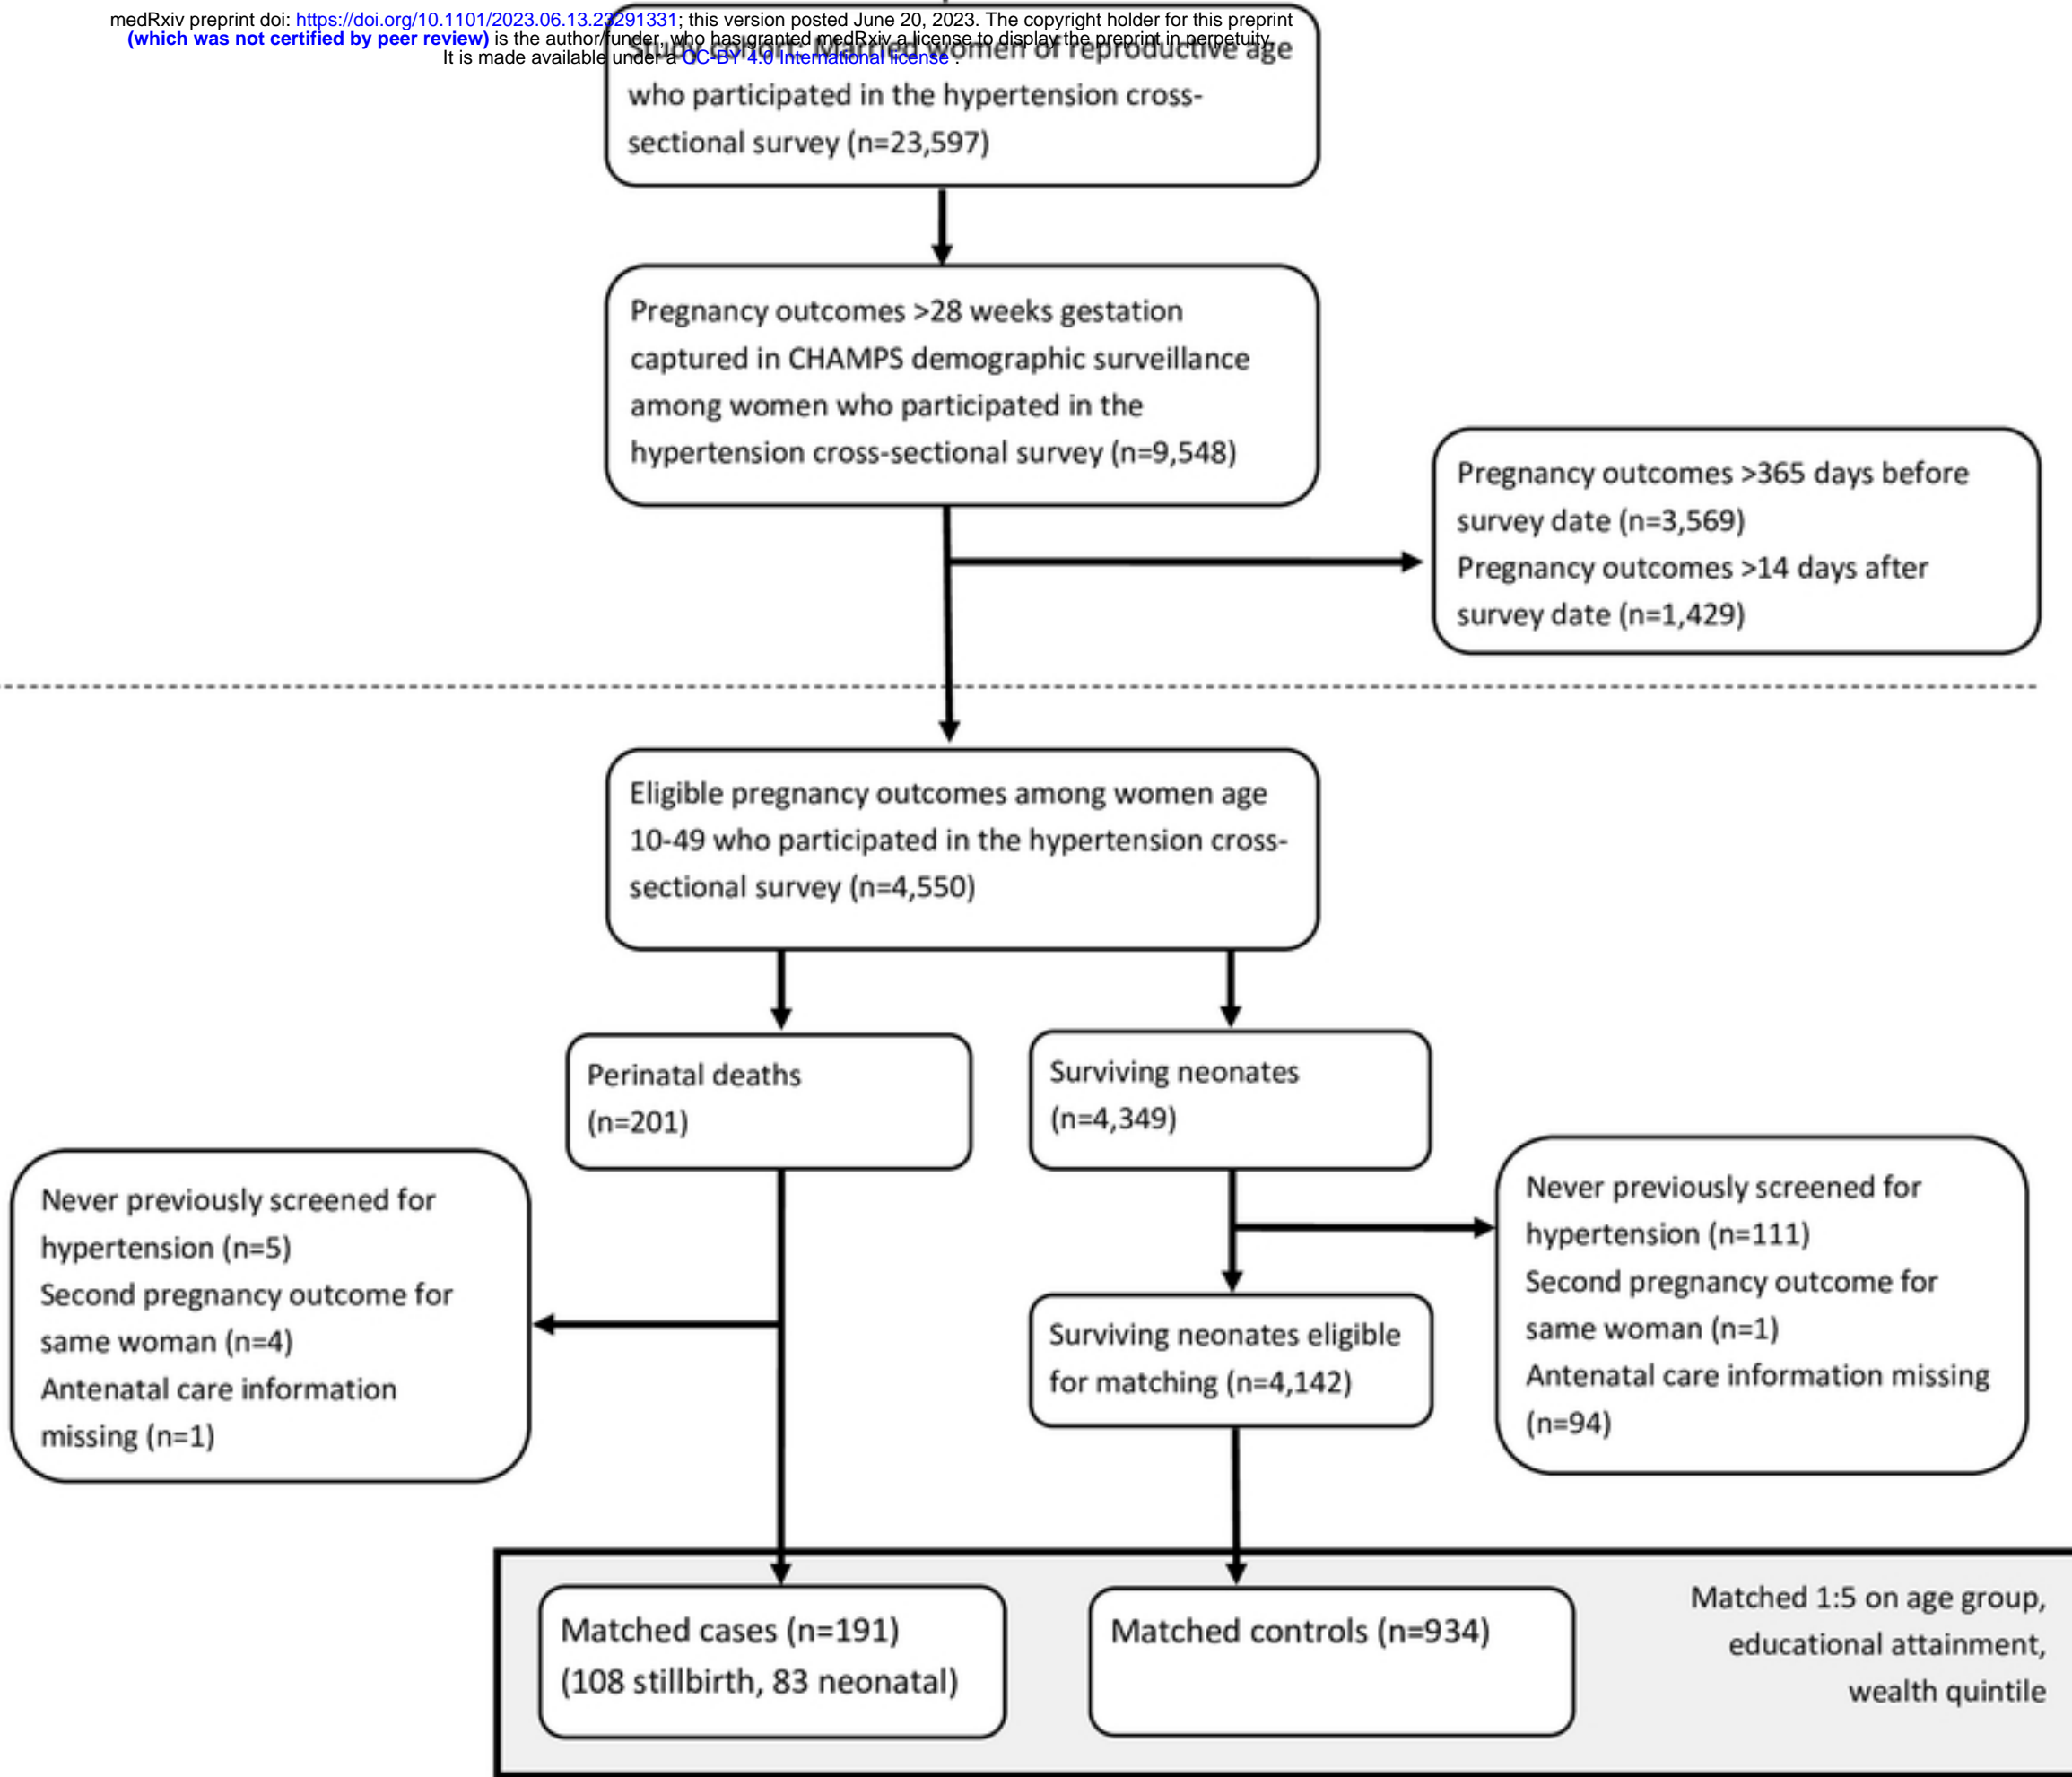

Figure 1

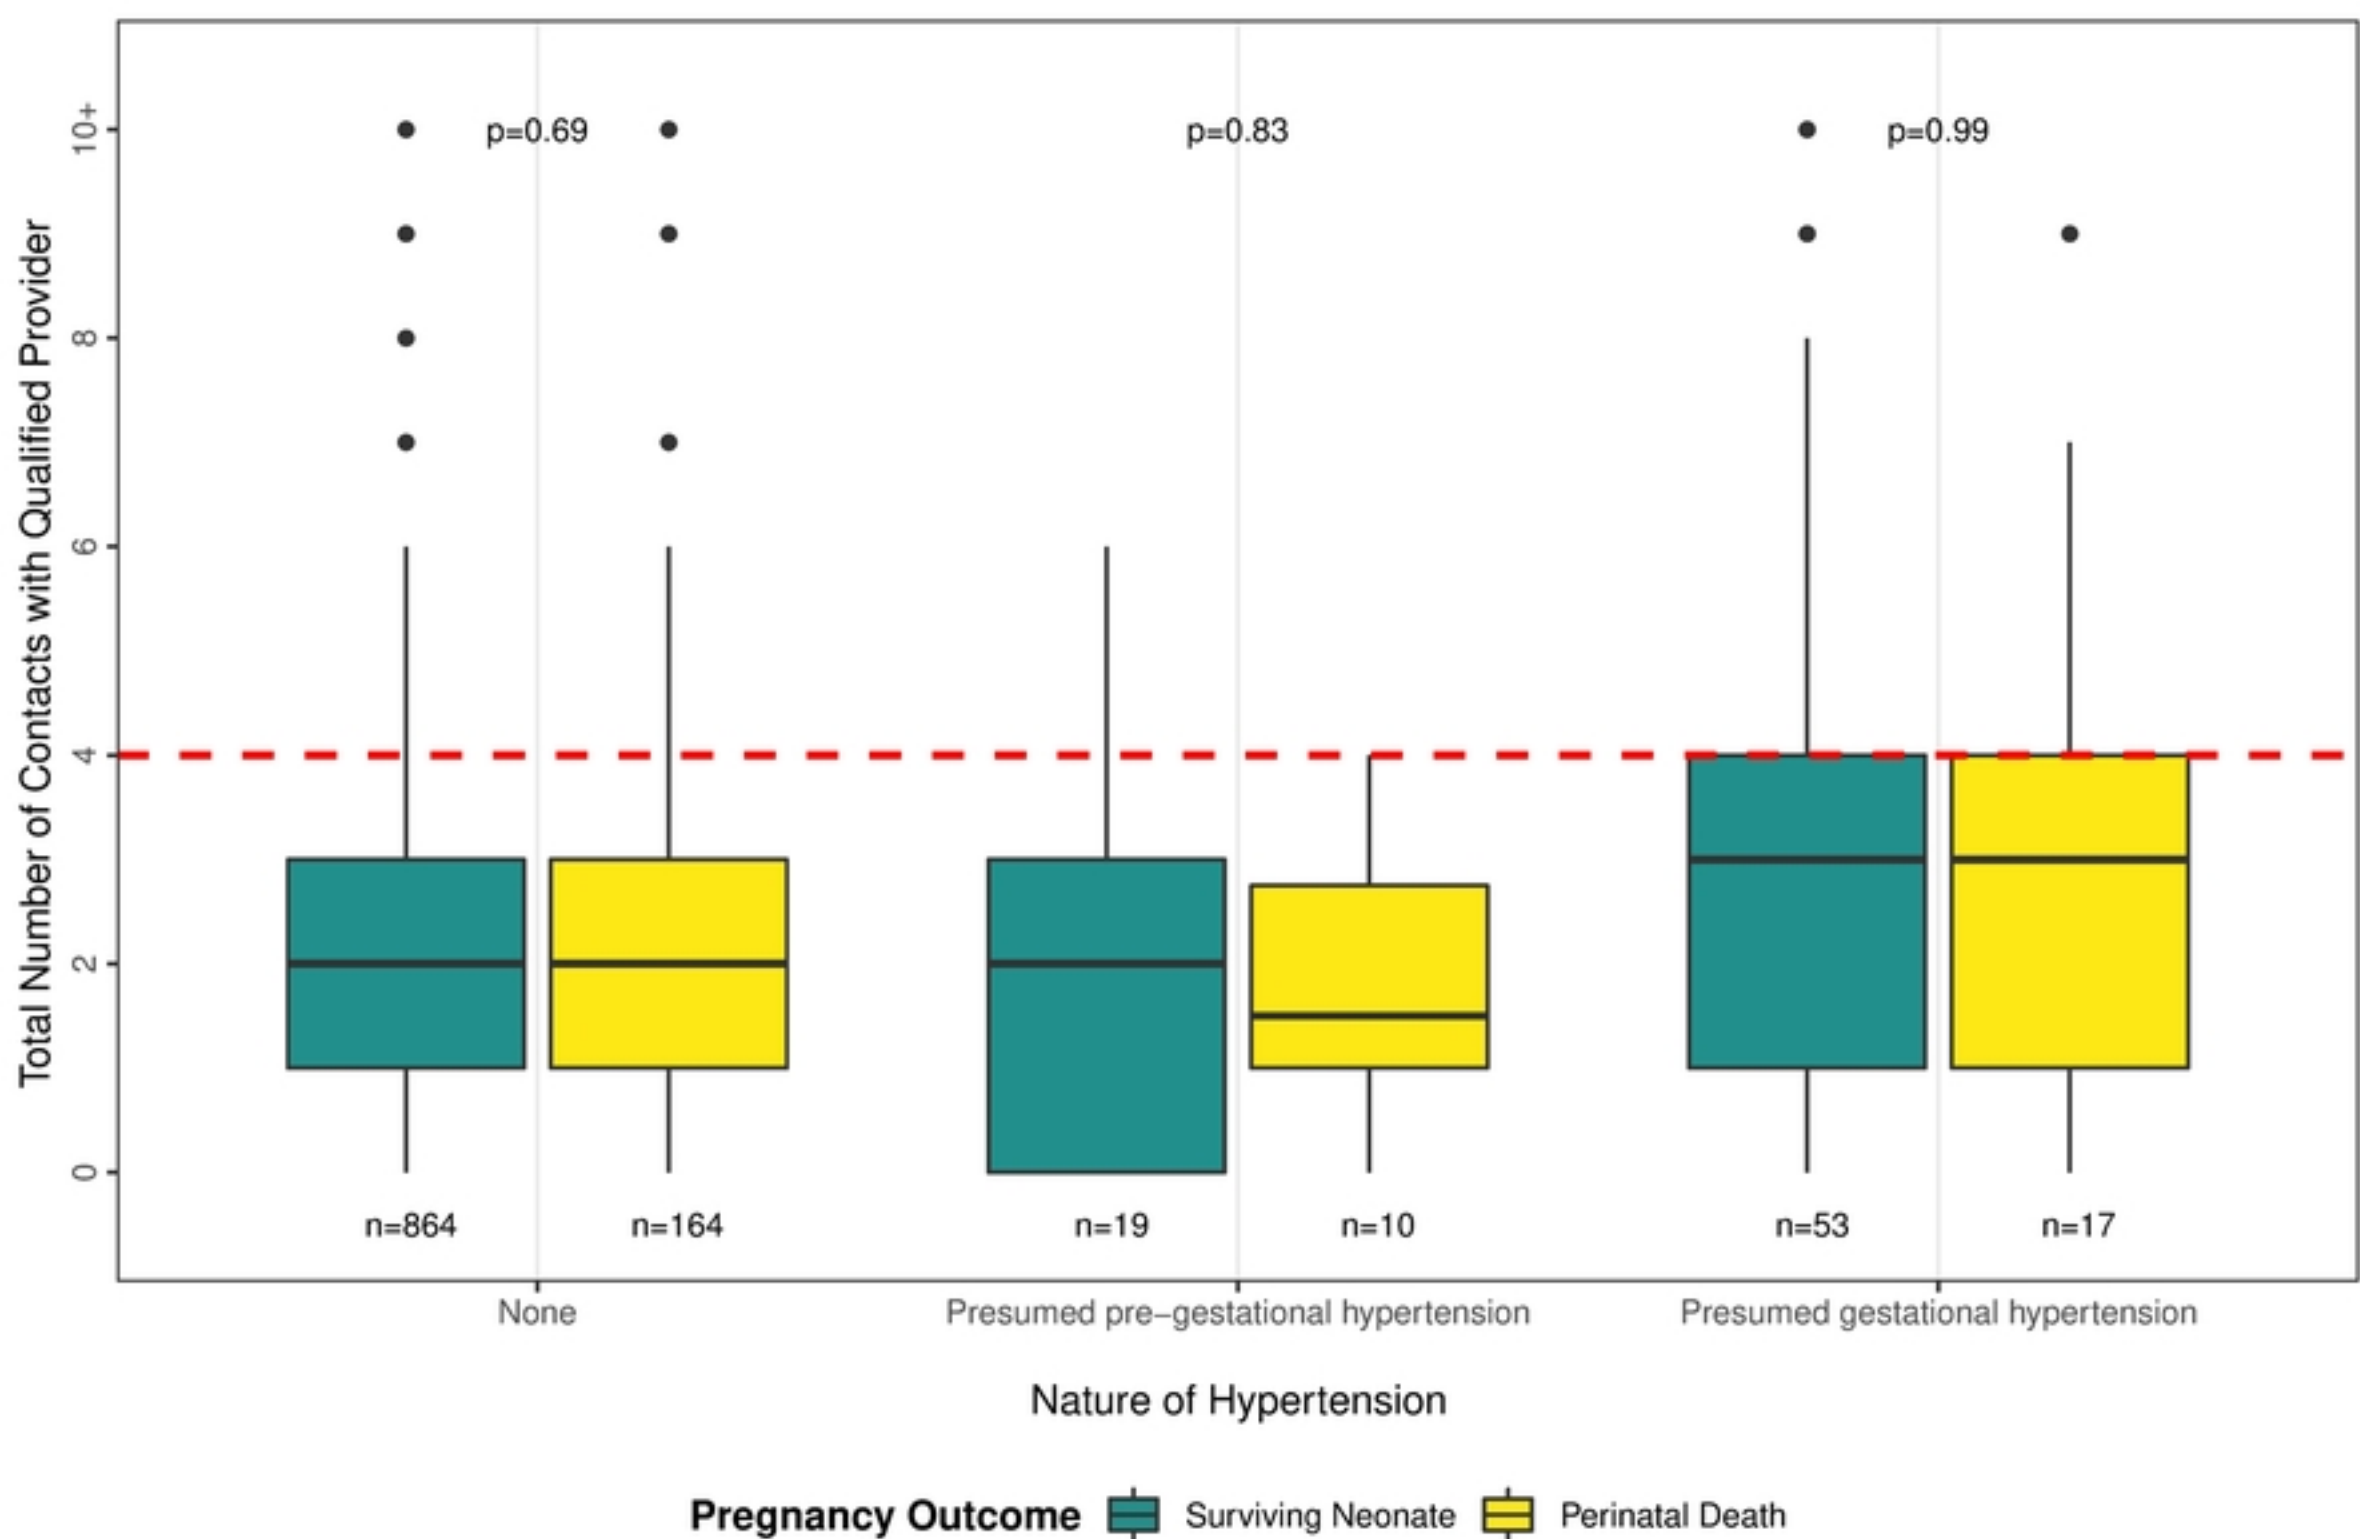

Figure 2

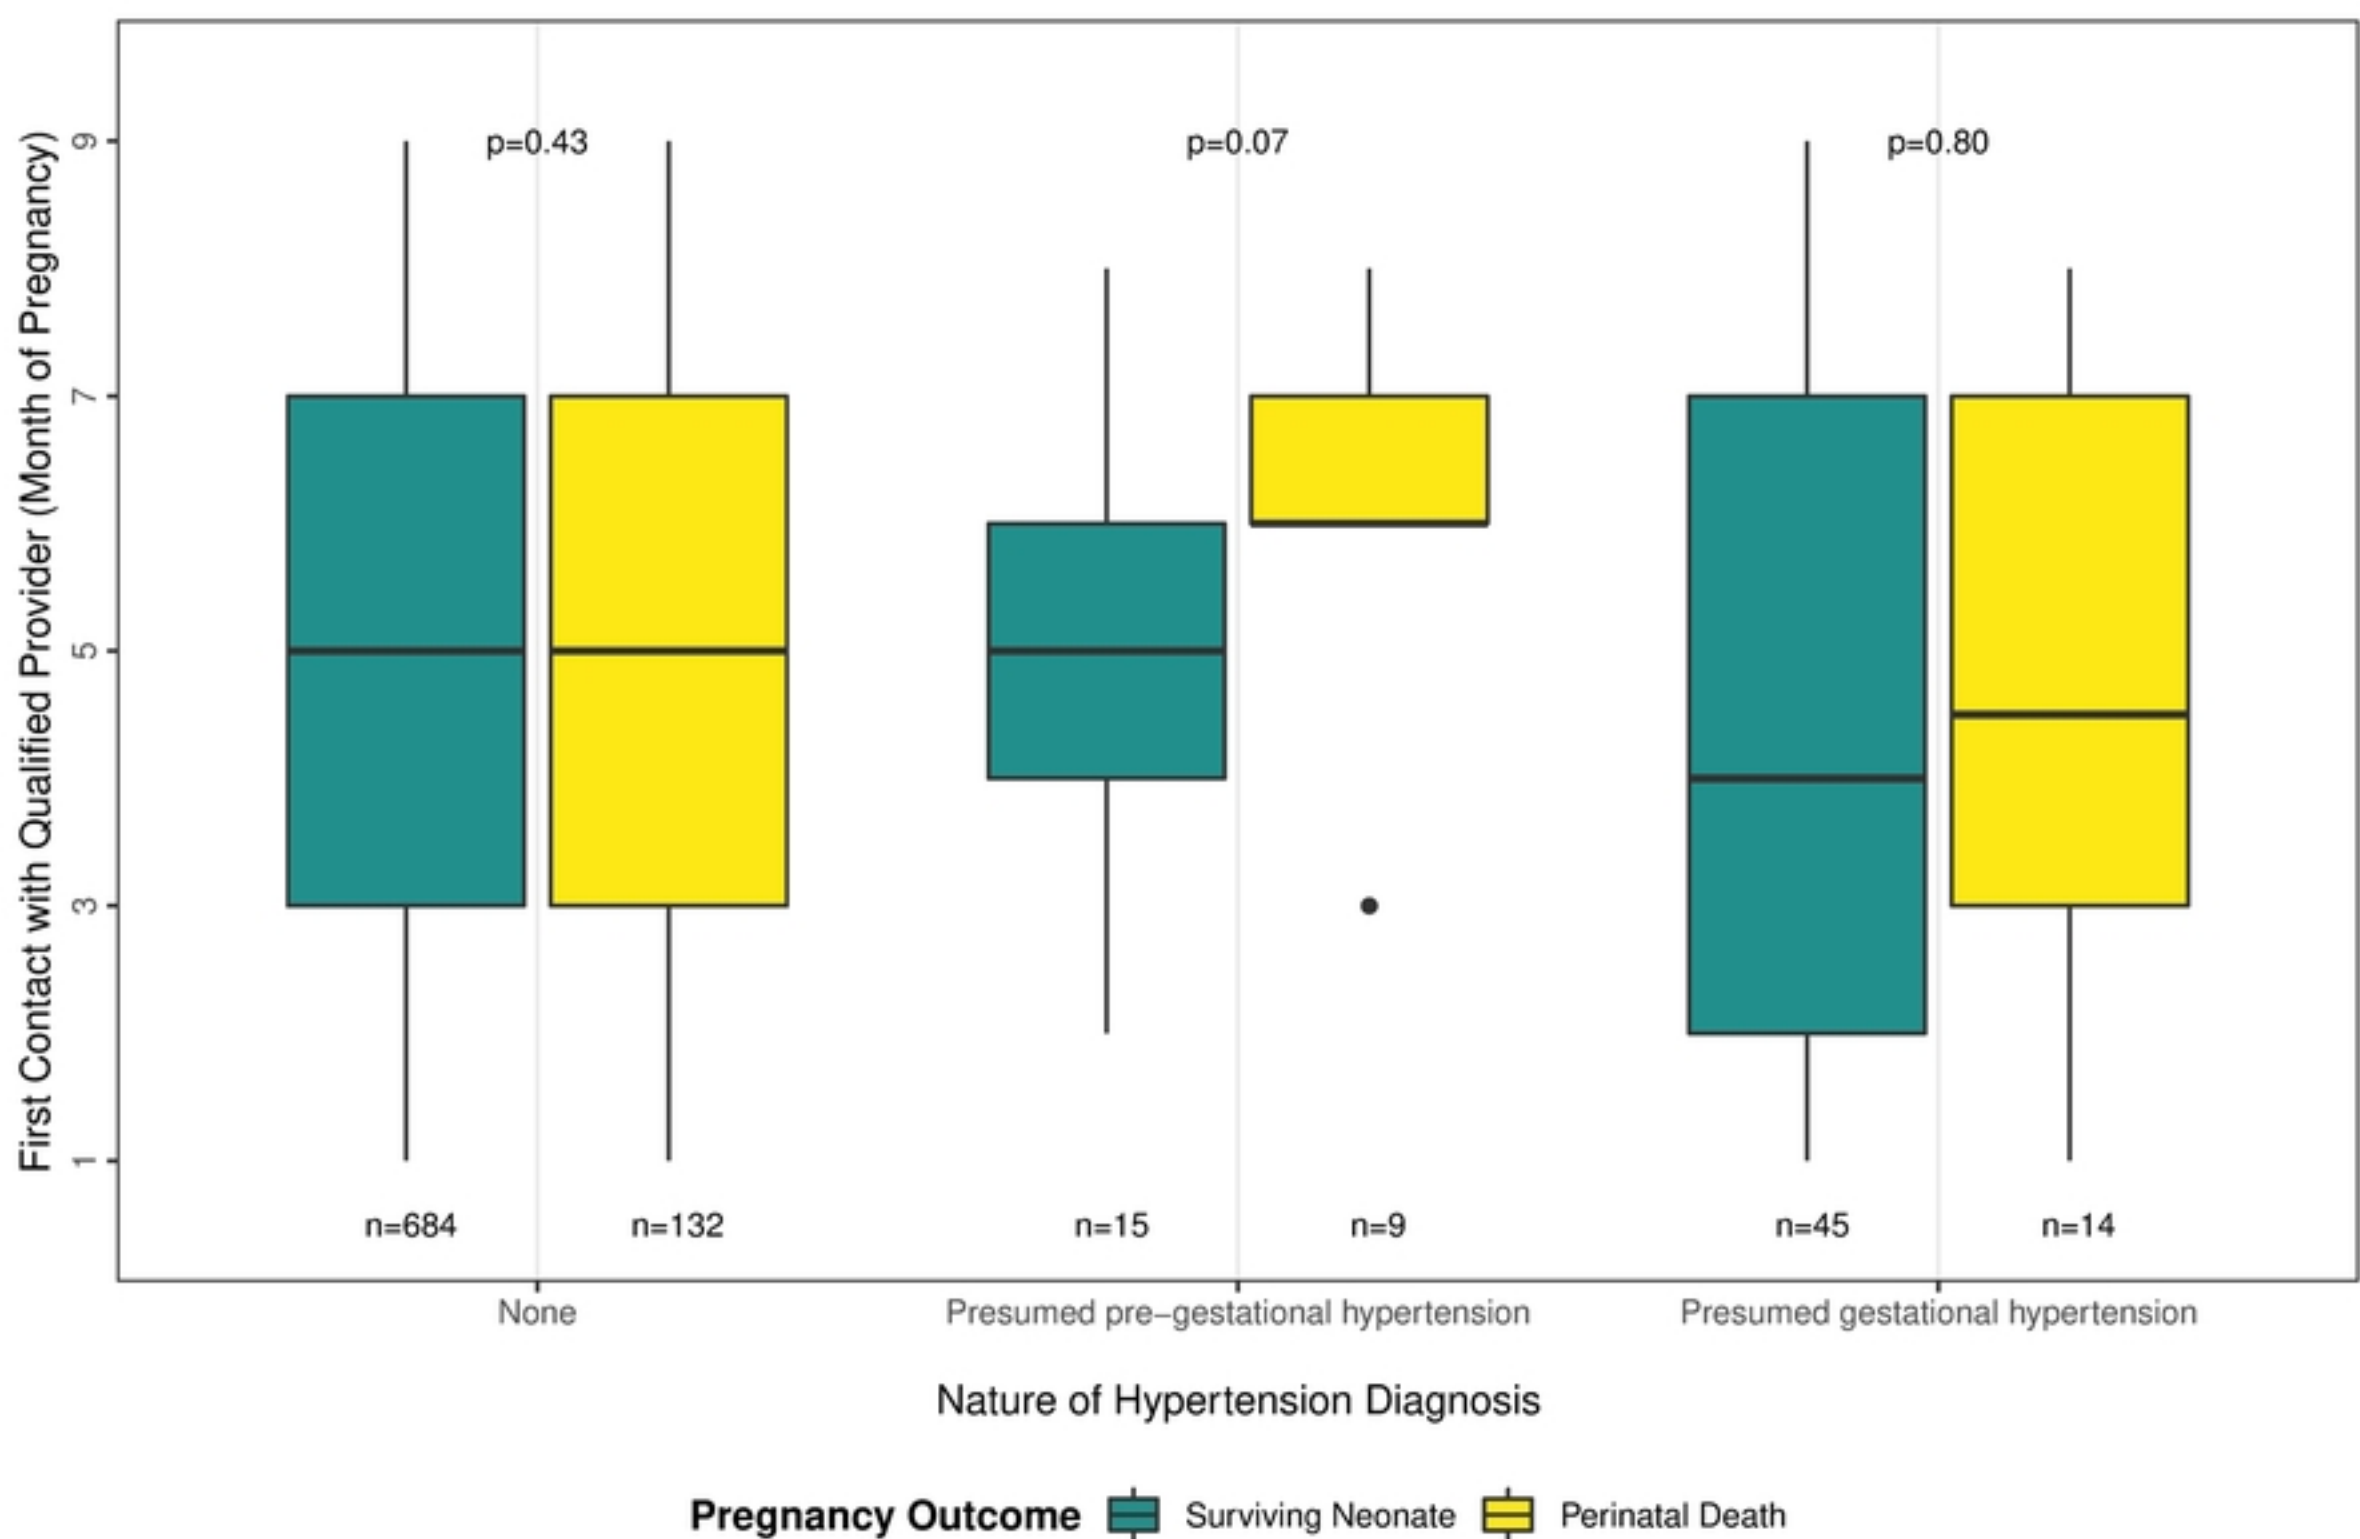

Figure 3
